# Supplementary material
Source: PubMed Central journal article supplement (PMC11520464)
Supplement: NIHMS2028894-supplement-Figs__S1_to_S8__Tables_S1_to_S6.pdf [file NIHMS2028894-supplement-Figs__S1_to_S8__Tables_S1_to_S6.pdf]

Supplementary Materials for  
**Transcobalamin receptor antibodies in autoimmune vitamin B12  
central deficiency**

John V. Pluvilage *et al.*

Corresponding author: John V. Pluvilage, john.pluvilage@ucsf.edu; Michael R. Wilson, michael.wilson@ucsf.edu

*Sci. Transl. Med.* **16**, ead13758 (2024)  
DOI: 10.1126/scitranslmed.ad13758

**The PDF file includes:**

Figs. S1 to S8  
Tables S1 to S6  
Legend for data file S1

**Other Supplementary Material for this manuscript includes the following:**

Data file S1  
MDAR Reproducibility Checklist

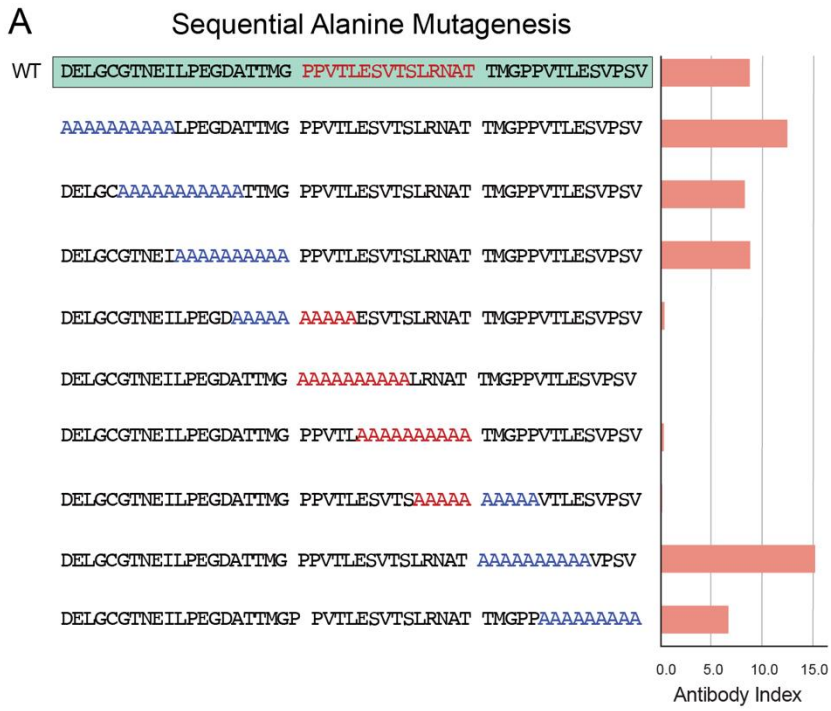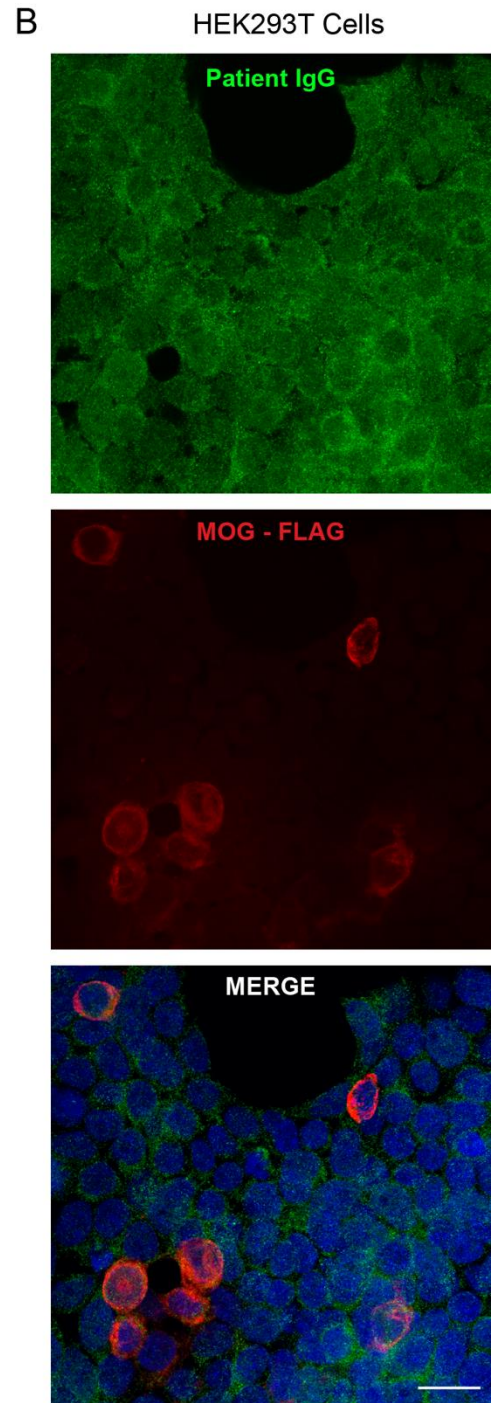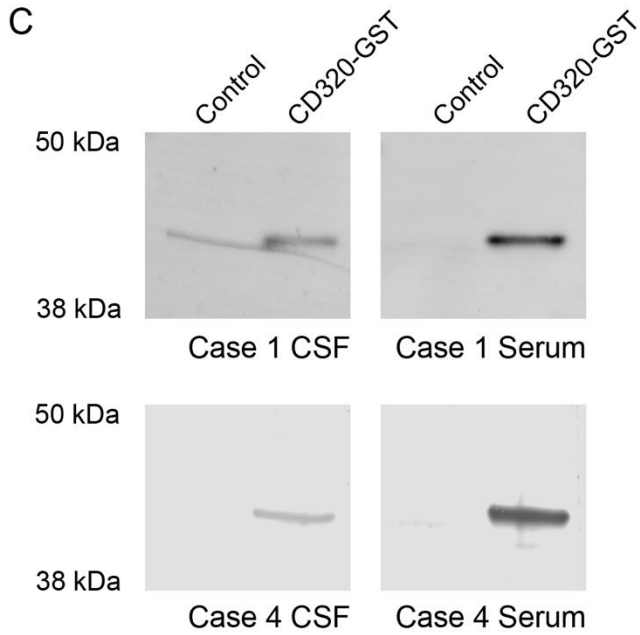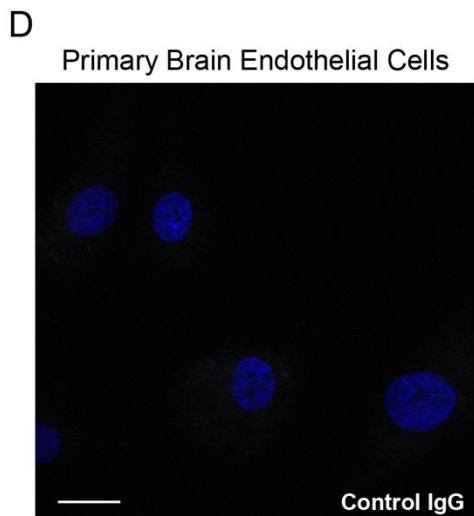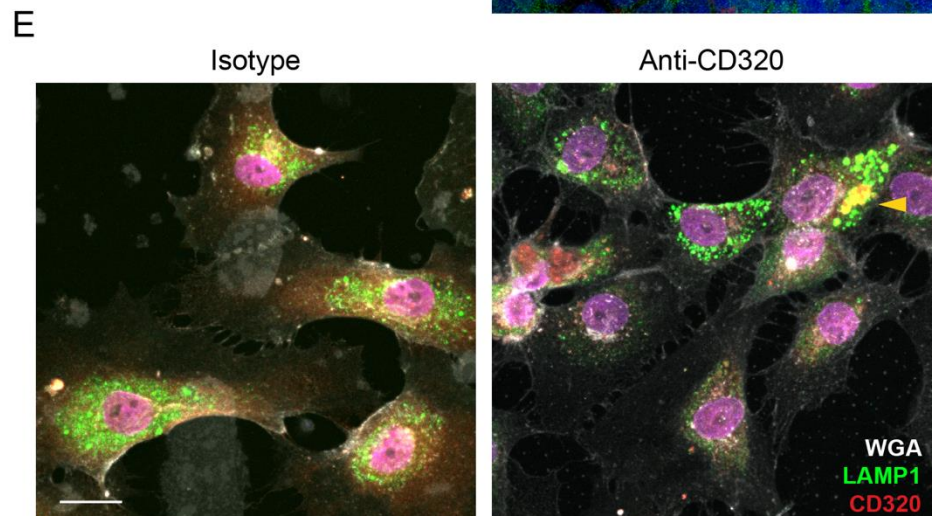

**Fig. S1. Elucidation of anti-CD320 epitope specificity.**

(A) Ten peptides comprising the CD320 wild-type (WT) sequence (green) or alanine substituted sequences were synthesized and immunoprecipitated with patient CSF antibodies. Antibody index was calculated by comparing the bioluminescence of peptides immunoprecipitated with CSF or protein A/G beads alone. The red sequence (Pro183-Thr197 of NP\_057663.1) denotes the antigenic region. (B) HEK293T cells were transfected with an irrelevant FLAG-tagged protein (MOG, red) and stained with patient IgG (green) (scale bar = 20 microns). (C) Western blot of anti-CD320 antibodies in the CSF and serum of Case 1 (top) and Case 4 (bottom). Recombinant full-length CD320 tagged with glutathione s-transferase (GST) or a truncated version of CD320 lacking the auto-epitope were immunoblotted with patient CSF or serum. (D) Immunostaining of primary human brain endothelial cells with healthy control CSF IgG (scale bar = 20 microns). E) Representative images of brain endothelial cells treated with a commercial anti-CD320 antibody and stained for CD320 (red), lysosomes (LAMP1, green), and the plasma membrane (WGA, gray) (scale bar = 20 microns).

A

### Human Tissue CD320 Expression

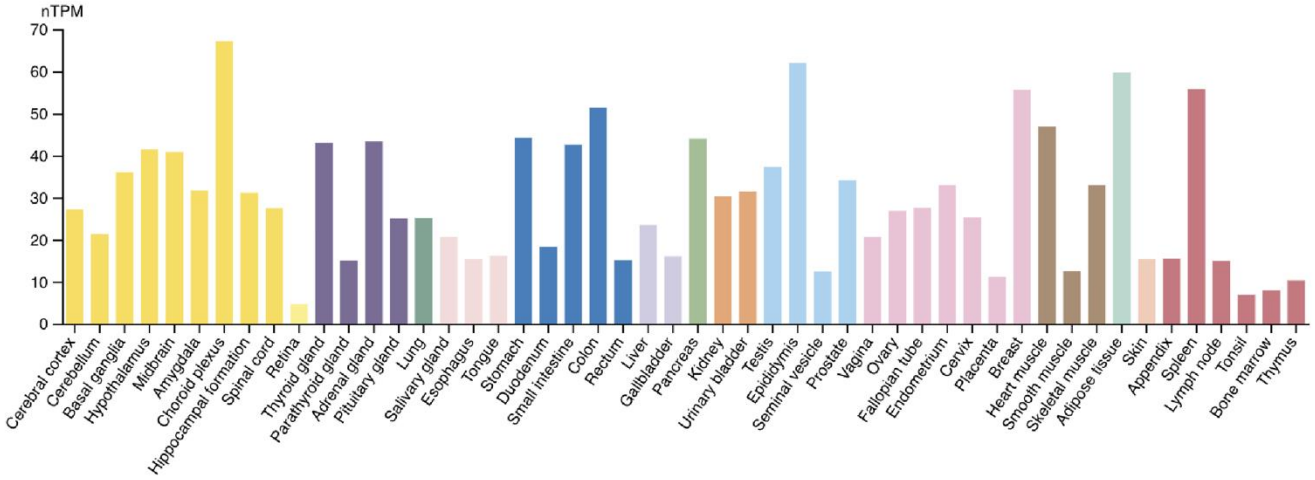

B

### Human Single Cell RNA-seq All Tissues

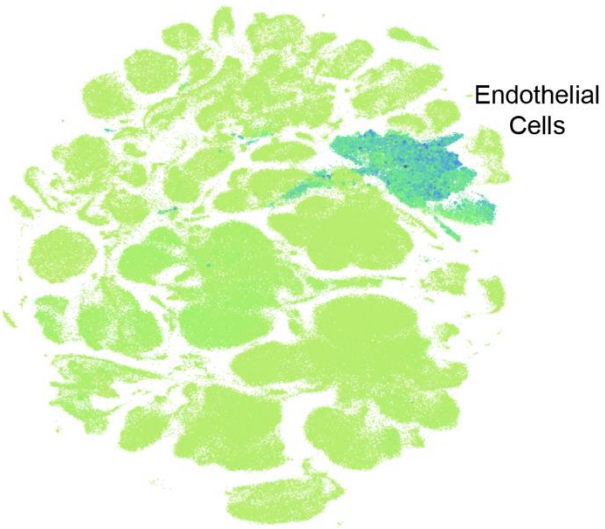

### Human Single Cell RNA-seq CD320 Expression

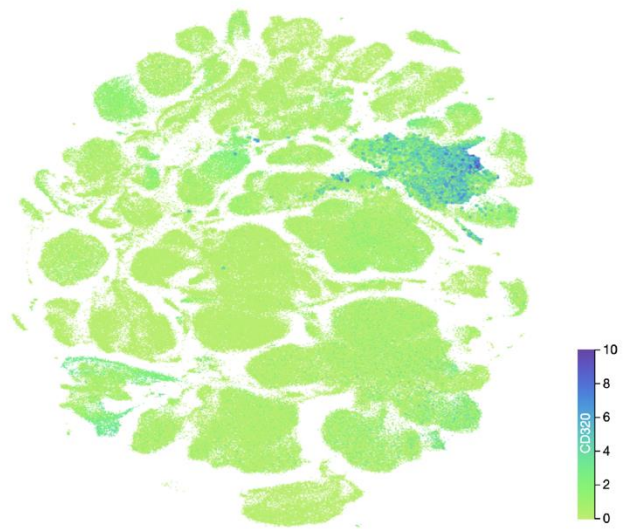

C

### Single Cell RNA-seq Endothelial Cells

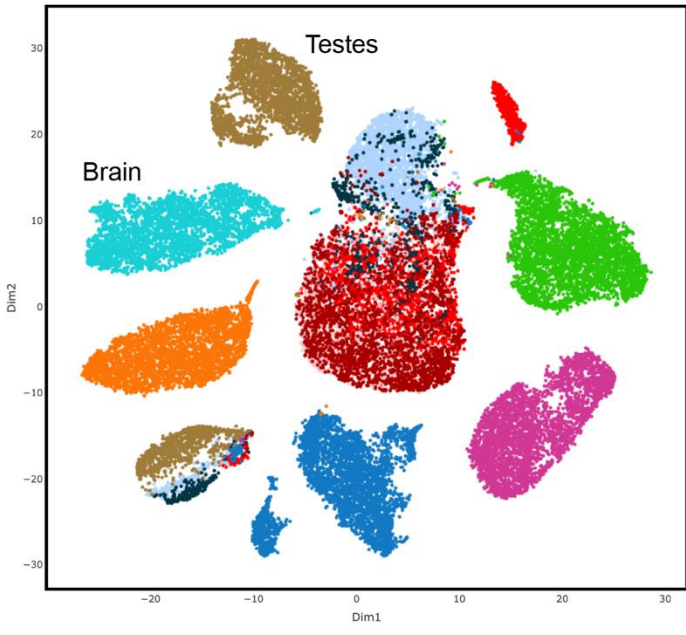

### CD320 Expression

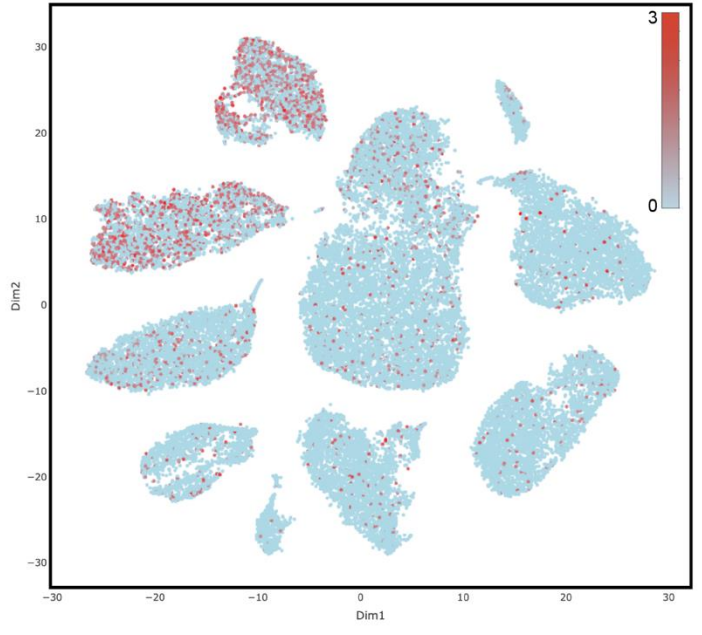

**Fig. S2. *CD320* expression in human tissues and single cells.**

(A) *CD320* expression in multiple human tissues, as measured by bulk RNA-sequencing from the Human Protein Atlas. (B) *CD320* expression in multiple human tissues, as measured by single-cell RNA-sequencing from the Tabula Sapiens project (17). (C) *CD320* expression in endothelial cells from multiple human tissues, as measured by single-cell RNA-sequencing from the EC database (18).

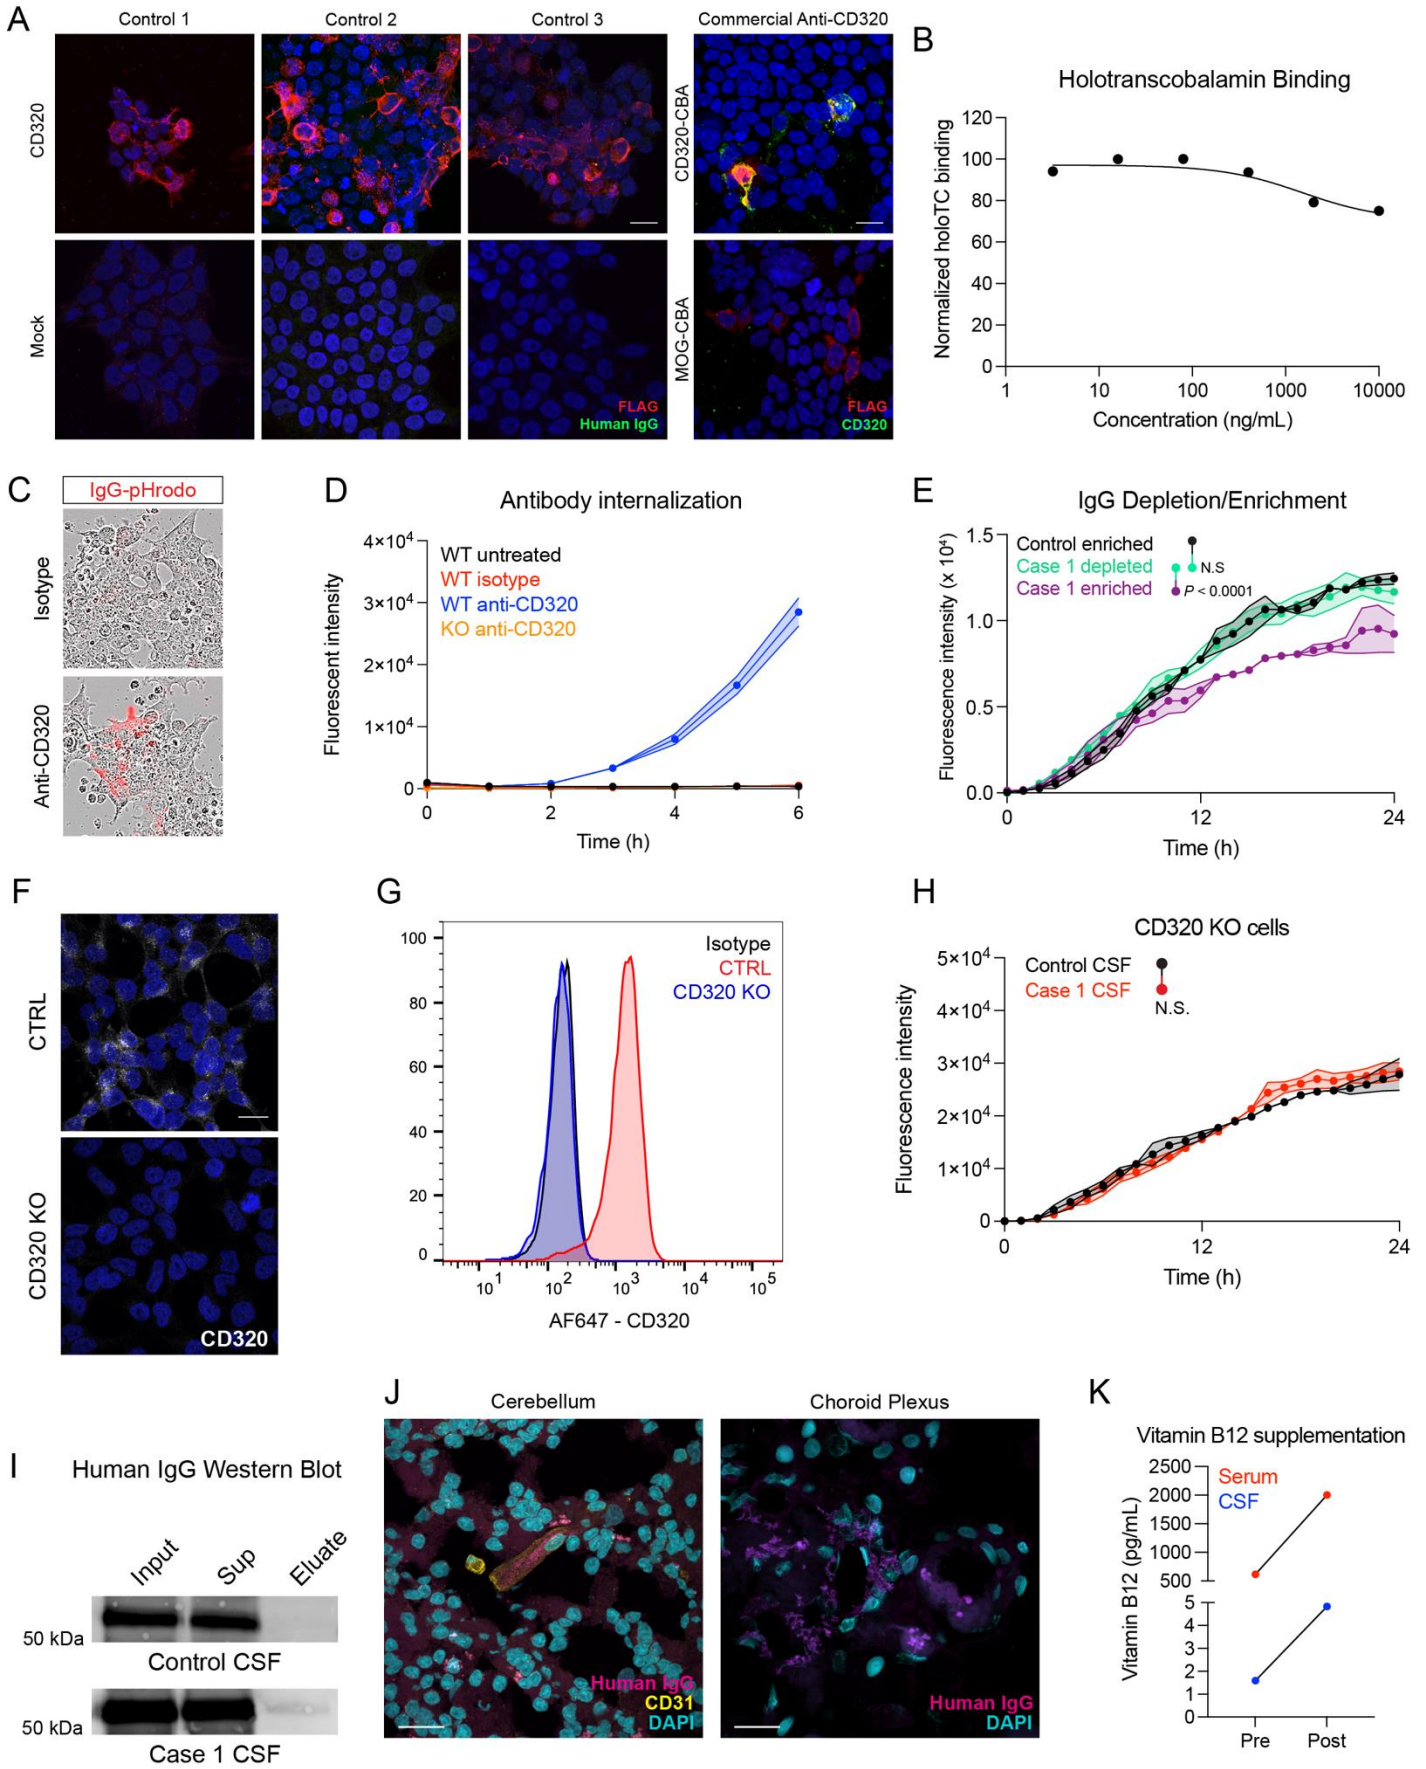

**Fig. S3. Immunoreactivity and mechanism of anti-CD320.**

(A) Immunoreactivity of healthy control CSF IgG (green) in HEK293T cells overexpressing FLAG-tagged CD320 (red) (scale bar = 20 microns). (B) Dose-response of commercial anti-CD320 on holotranscobalamin binding to the surface of HEK293T cells. (C) Representative images of antibody internalization in cells treated with a commercial anti-CD320 antibody or an isotype control antibody. (D) Internalization of a commercial anti-CD320 or isotype control antibody in wild type or CD320 KO HEK293T cells (N=3, mean +/- standard error). (E) Holotranscobalamin uptake in HEK293T cells treated with IgG-enriched control CSF (black), IgG-enriched case 1 CSF (magenta), or IgG-depleted case 1 CSF (green) (N=3, paired one-way ANOVA with Tukey's multiplicity correction, mean +/- standard error). (F) Immunocytochemical staining of control and CD320 KO HEK293T cells with a commercial CD320 antibody (scale bar, 20 microns). (G) Flow cytometric quantification of CD320 expression on control and CD320 KO HEK293T cells. (H) Holotranscobalamin uptake in CD320 KO HEK293T cells treated with control (black) or case 1 (red) CSF (N=3, paired one-way ANOVA with Tukey's multiplicity correction, mean +/- standard error). (I) Western blot for human IgG from input, supernatant, and eluate of an antigen-specific affinity purification of control (top) or patient (bottom) CSF. (J) Staining of human cerebellum and choroid plexus tissue with patient immunoglobulin (magenta) and the endothelial marker, CD31 (yellow) (scale bar = 20 microns). (K) Vitamin B12 concentration in case 1 serum (red) and CSF (blue) pre- and post-B12 supplementation.

A

CLUSTAL O(1.2.4) multiple sequence alignment

```
clone_1_HC  EVQLVESGGGFVKPGGSLRLSCAASGFTFSDAWMTWVRQAPGKGLEWVGHIKTRSEGEKT  60
clone_2_HC  EVQLVESGGGFVKPGGSLRLSCAASGFTFSDAWMTWVRQAPGKGLEWVGHIKTRSEGEKT  60
clone_3_HC  EVQLVESGGGFVKPGGSLRLSCAASGFTFSDAWMTWVRQAPGKGLEWVGHIKTRSEGEKT  60
clone_4_HC  EVQLVESGGGFVKPGGSLRLSCAASGFTFSDAWMTWVRQAPGKGLEWVGHIKTRSEGEKT  60
clone_5_HC  EVQLVESGGGFVKPGGSLRLSCAASGFTFSDAWMTWVRQAPGKGLEWVGHIKTRSEGEKT  60

clone_1_HC  DYNTPVKGRFTISRDDSRDTVYLEMTSLRTEDTAVYFCLCDLDYWGQGTLSVSS      115
clone_2_HC  DYNTPVKGRFTISRDDSRDTVYLEMTSLRTEDTAVYFCLCDLDYWGQGTLSVSS      115
clone_3_HC  DYNTPVKGRFTISRDDSRDTVYLEMTSLRTEDTAVYFCLCDLDYWGQGTLSVSS      115
clone_4_HC  DYNTPVKGRFTISRDDSRDTVYLEMTSLRTEDTAVYFCLCDLDYWGQGTLSVSS      115
clone_5_HC  DYNTPVKGRFTISRDDSRDTVYLEMTSLRTEDTAVYFCLCDLDYWGQGTLSVSS      115

clone_1_LC  DIQMTQSPSSLSASIGDRVTLTCRASQGIHKYLAWYQQKPGKAPKSLIYEASILQTWVPS  60
clone_2_LC  DIQMTQSPSSLSASIGDRVTLTCRASQGIHKYLAWYQQKPGKAPKSLIYEASILQTWVPS  60
clone_3_LC  DIQMTQSPSSLSASIGDRVTLTCRASQGIHKYLAWYQQKPGKAPKSLIYEASILQTWVPS  60
clone_4_LC  DIQMTQSPSSLSASIGDRVTLTCRASQGIHKYLAWYQQKPGKAPKSLIYEASILQTWVPS  60
clone_5_LC  DIQMTQSPSSLSASIGDRVTLTCRASQGIHKYLAWYQQKPGKAPKSLIYEASILQTWVPS  60

clone_1_LC  KFNGSGSGTEFTLTINSLQPEDFATYYCQQYTNPFTFGPGTKVDFK      107
clone_2_LC  KFNGSGSGTEFTLTINSLQPEDFATYYCQQYTNPFTFGPGTKVDFK      107
clone_3_LC  KFNGSGSGTEFTLTINSLQPEDFATYYCQQYTNPFTFGPGTKVDFK      107
clone_4_LC  KFNGSGSGTEFTLTINSLQPEDFATYYCQQYTNPFTFGPGTKVDFK      107
clone_5_LC  KFNGSGSGTEFTLTINSLQPEDFATYYCQQYTNPFTFGPGTKVDFK      107
```

B

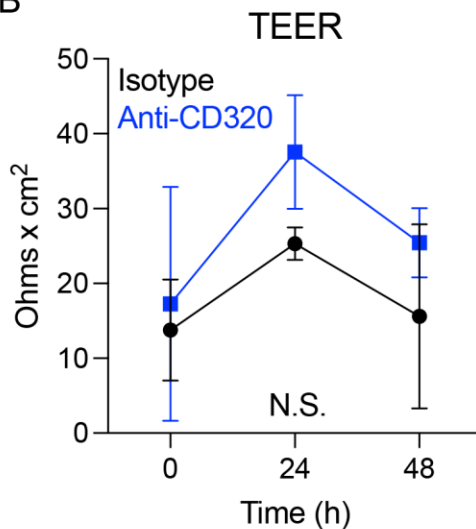

**Fig. S4. Characterization of a patient-derived monoclonal autoantibody.**

(A) Multiple sequence alignment of heavy chain and light chain variable regions of all 5 CD320-specific clones. (B) Trans-endothelial electrical resistance (TEER) measurements of iPSC-derived human endothelial transwell monolayers treated with isotype control (black) or anti-CD320 (blue). Measurements were acquired on day 4 after plating at time of treatment (T=0) and every 24 hours after treatment (N=3, two-way ANOVA; mean +/- standard deviation).



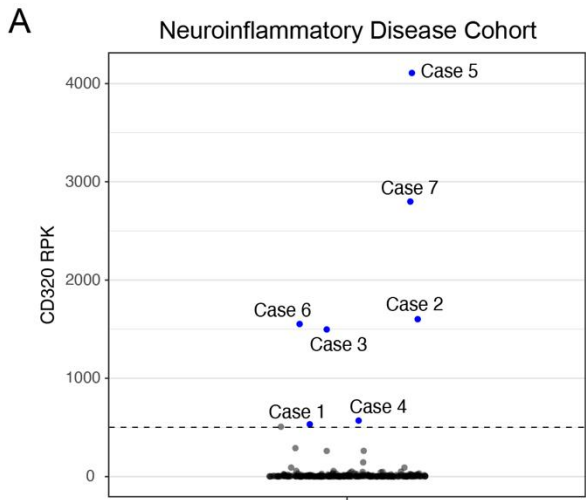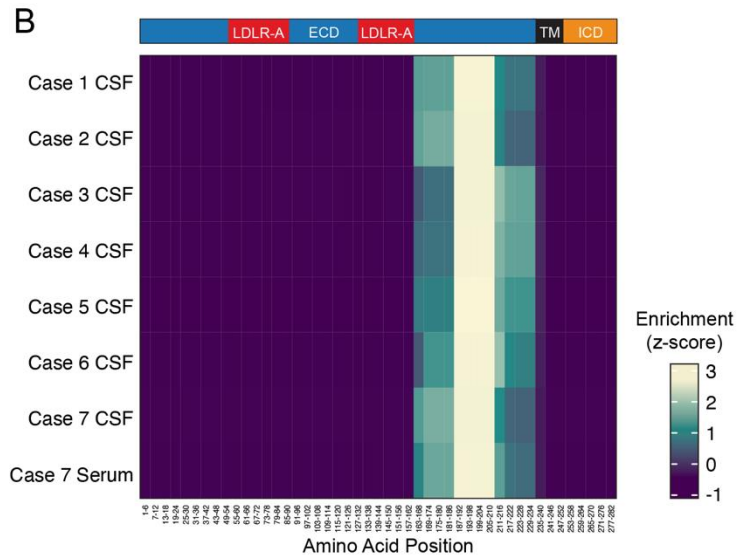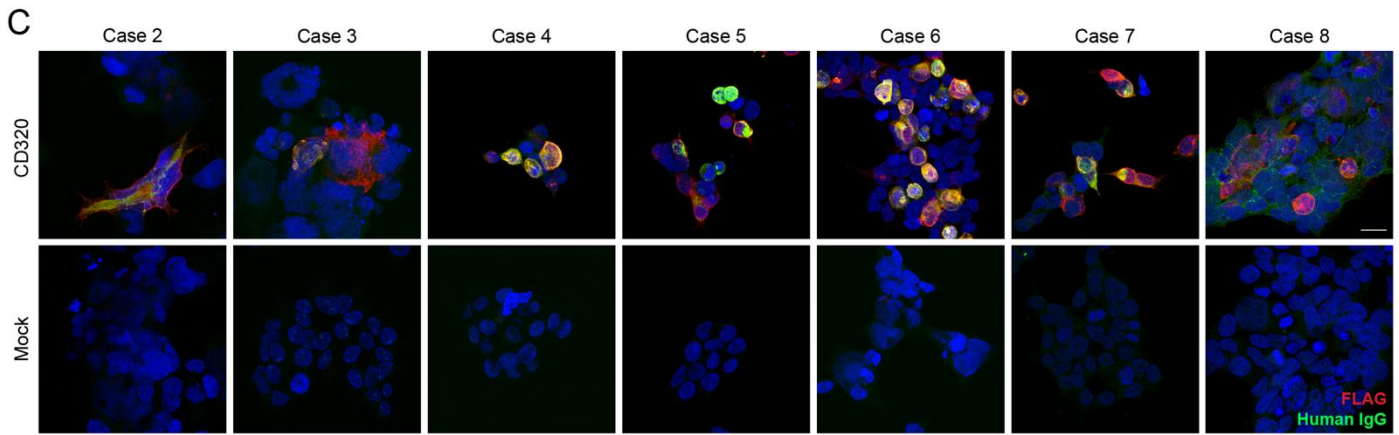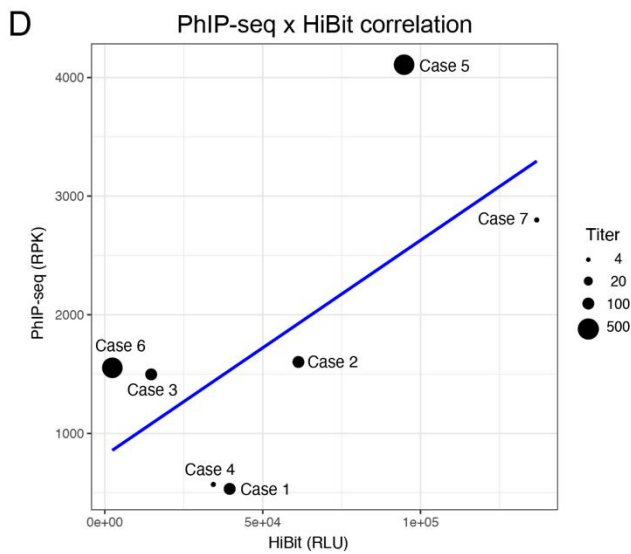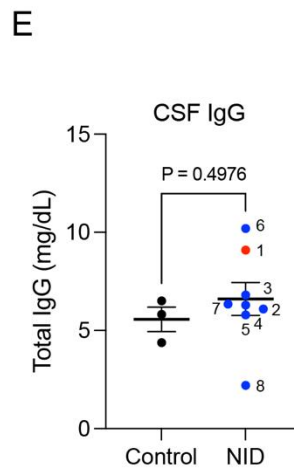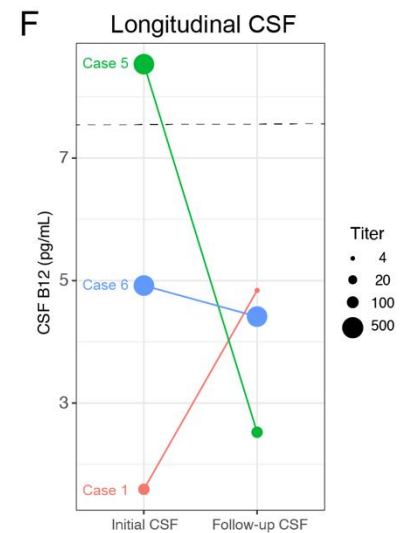

**Fig. S5. Characterization of additional anti-CD320 seropositive patients.**

(A) CD320 enrichment from PhIP-seq experiments on 254 CSF samples from a neuroinflammatory disease cohort. Labeled samples exhibit CD320 enrichment equal to or greater than CD320 enrichment in the index patient (dotted line). Enrichment was quantified as sequencing reads per 100,000 (RPK) to account for differences in sequencing depth between samples. (B) Epitope map of CD320 peptides aligned to the full-length gene (coverage is divided into five amino acid bins). (C) Immunoreactivity of CSF IgG (green) for human cells overexpressing FLAG-tagged CD320 (red). Nuclei are stained blue with DAPI (scale bar, 20 microns). (D) Correlation between PhIP-seq, HiBit measurements of autoantibody target enrichment, and autoantibody titer as determined by cell-based assay. (E) Total IgG concentrations in control CSF and case CSF (two-sided t-test; mean +/- standard error). (F) CSF autoantibody titer and corresponding CSF B12 concentrations in three patients for whom longitudinal spinal fluid samples were available.

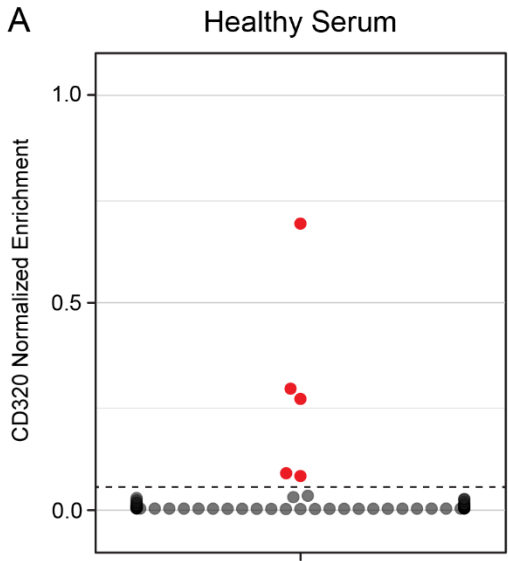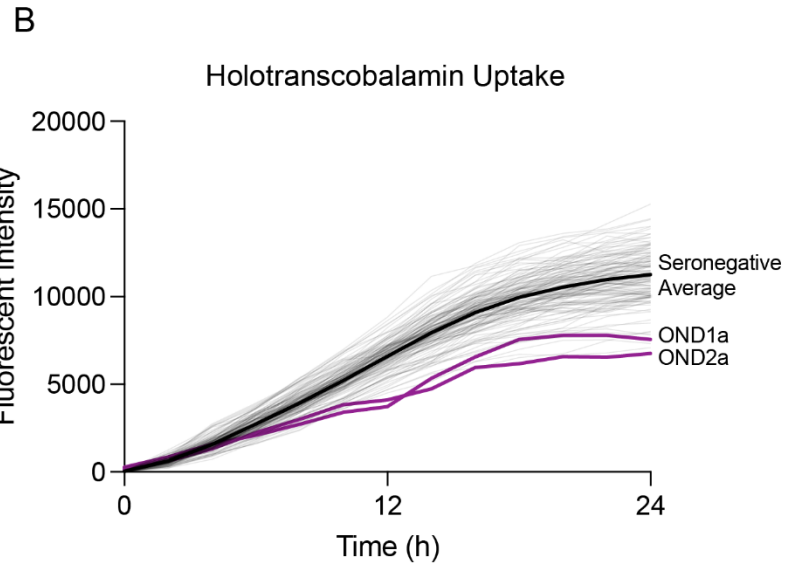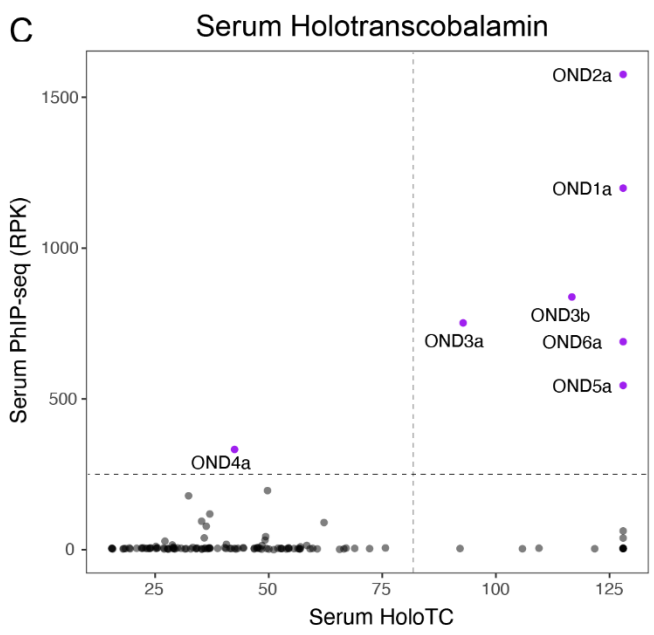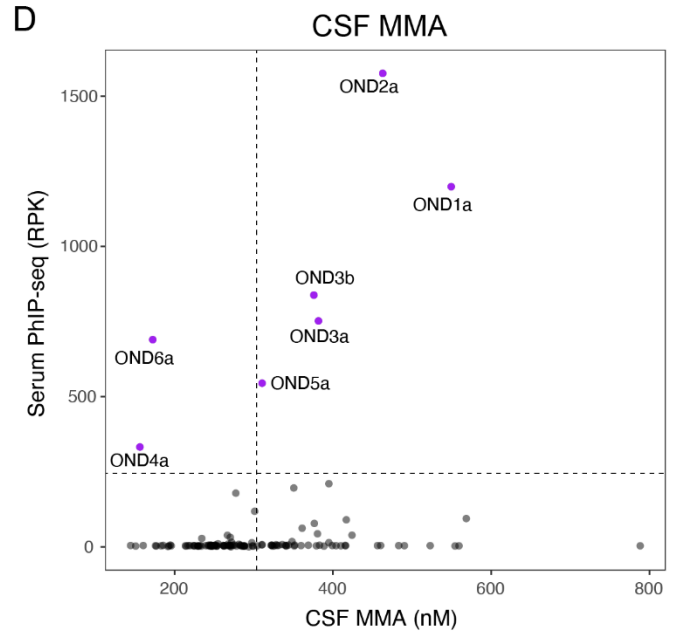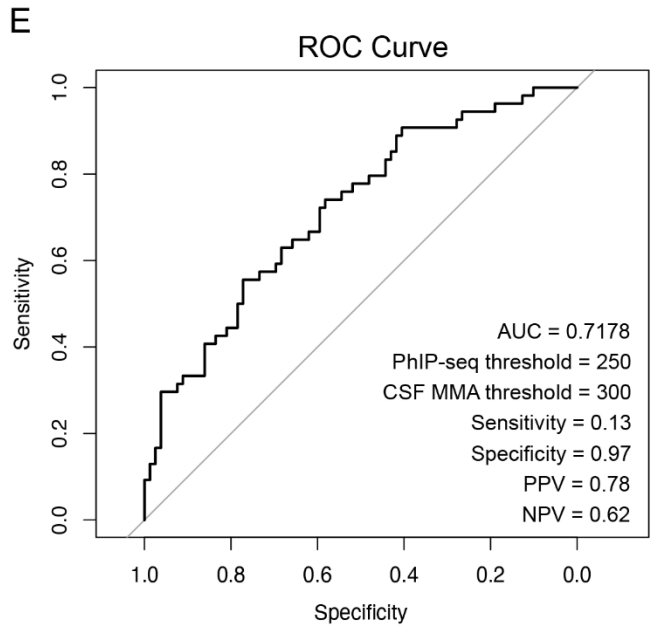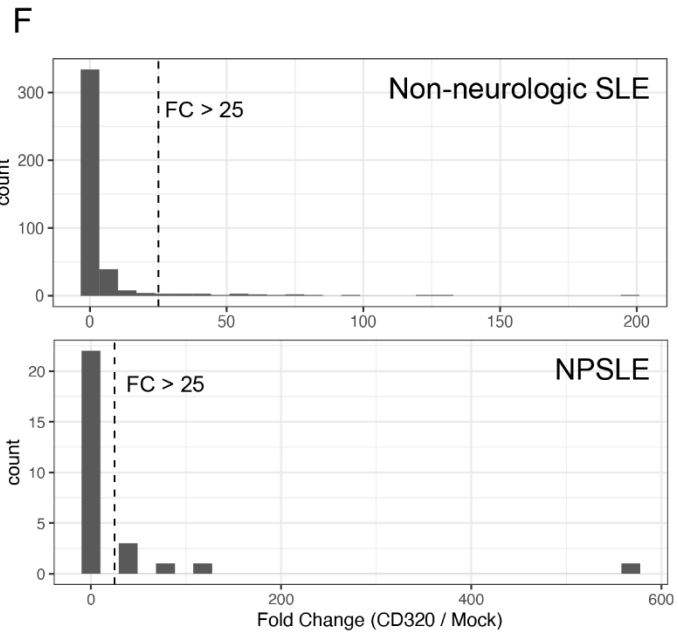

**Fig. S6. Detection of anti-CD320 in healthy controls and patients with multiple sclerosis or other neurologic diseases.**

(A) Normalized bioluminescent signal from immunoprecipitation of a tagged CD320 peptide after incubation with serum from 84 healthy controls. The dotted line corresponds to a CD320 enrichment threshold set using CSF from the index patient. (B) Holotranscobalamin uptake by HEK293T cells treated with CSF from 132 patients with multiple sclerosis (MS) or other neurologic diseases (ONDs). Holotranscobalamin uptake in cells treated with CSF from the two cases with the highest intrathecal anti-CD320 enrichment is indicated by purple lines, and the average effect for CSF from all seronegative patients is indicated by the black line. (C) Serum holotranscobalamin concentration vs serum anti-CD320 enrichment in patients with MS or ONDs. (D) CSF MMA concentration vs serum anti-CD320 enrichment in patients with MS or ONDs. (E) Receiver operator characteristic (ROC) curve showing the performance of serum anti-CD320 seropositivity for predicting a high CSF MMA concentration (F) Histograms of CD320 enrichment (fold change over mock) in non-neurologic SLE (top) and NPSLE (bottom). Dashed line shows a fold-change cutoff of 25, above which samples are considered seropositive.

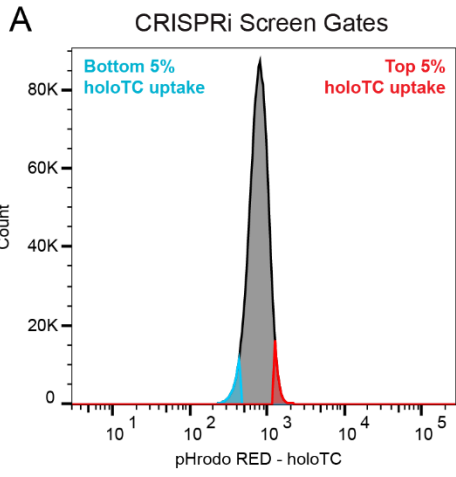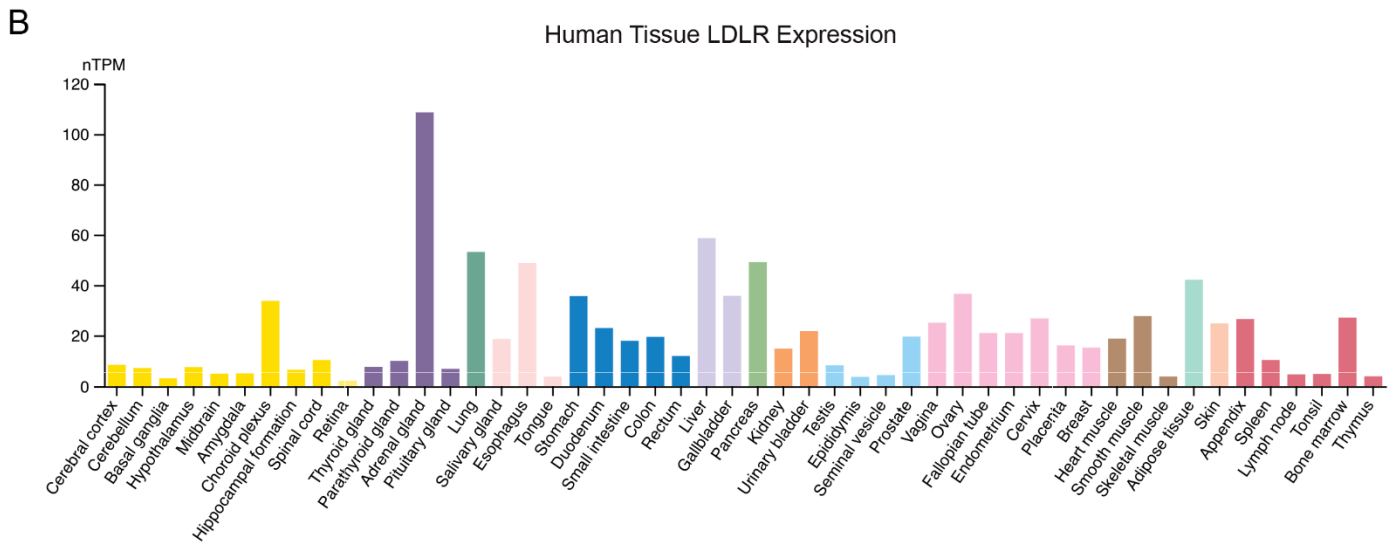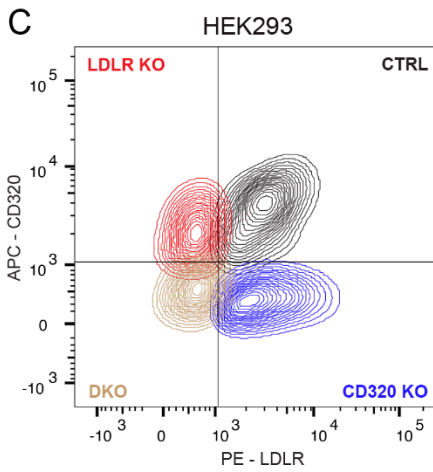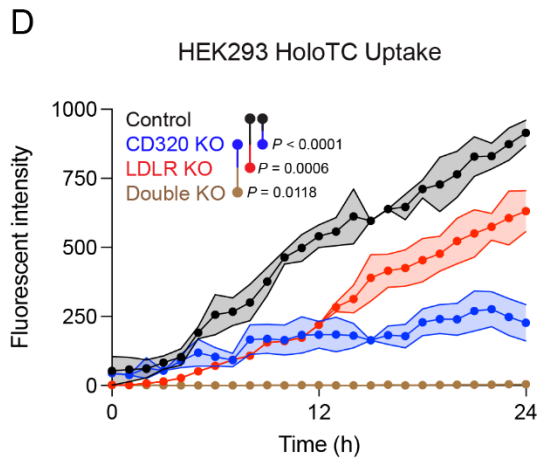

**Fig. S7. Validation of CRISPRi Screen Hits.**

(A) Gating strategy for the CRISPRi screen, wherein K562 library cells with the top 5% (red) or bottom 5% (blue) of internalized holotranscobalamin (represented by pHrodo RED signal) were sorted by FACS. A total of 15 million cells of each population were sorted from 300 million total library cells, each in technical duplicate. (B) *LDLR* expression in multiple human tissues, as measured by bulk RNA-sequencing from the Human Protein Atlas. (C) Flow cytometry plots of control (black), CD320 KO (blue), LDLR KO (red), and double KO (brown) HEK293 cells. (D) Holotranscobalamin uptake by control (black), CD320 KO (blue), LDLR KO (red), or double KO (brown) HEK293 cells (N=3, one-way ANOVA with Tukey's multiplicity correction, mean +/- standard error).

**A** Proposed Model of Autoimmune B12 Central Deficiency

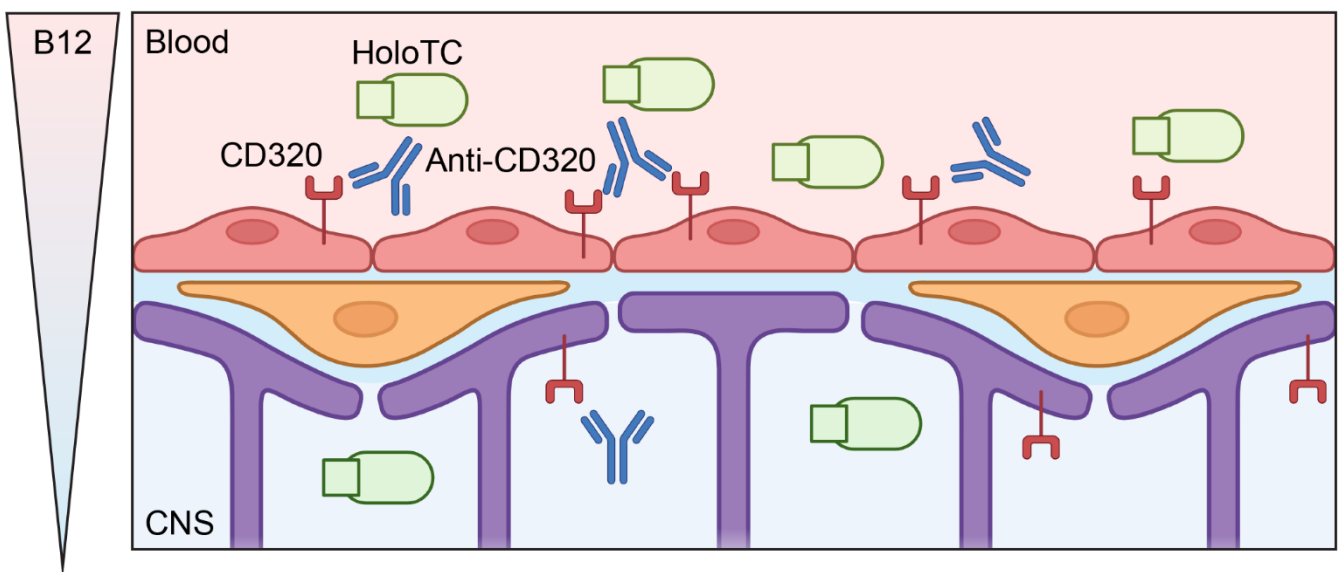

**B** Proposed Natural History of Central Vitamin B12 Deficiency

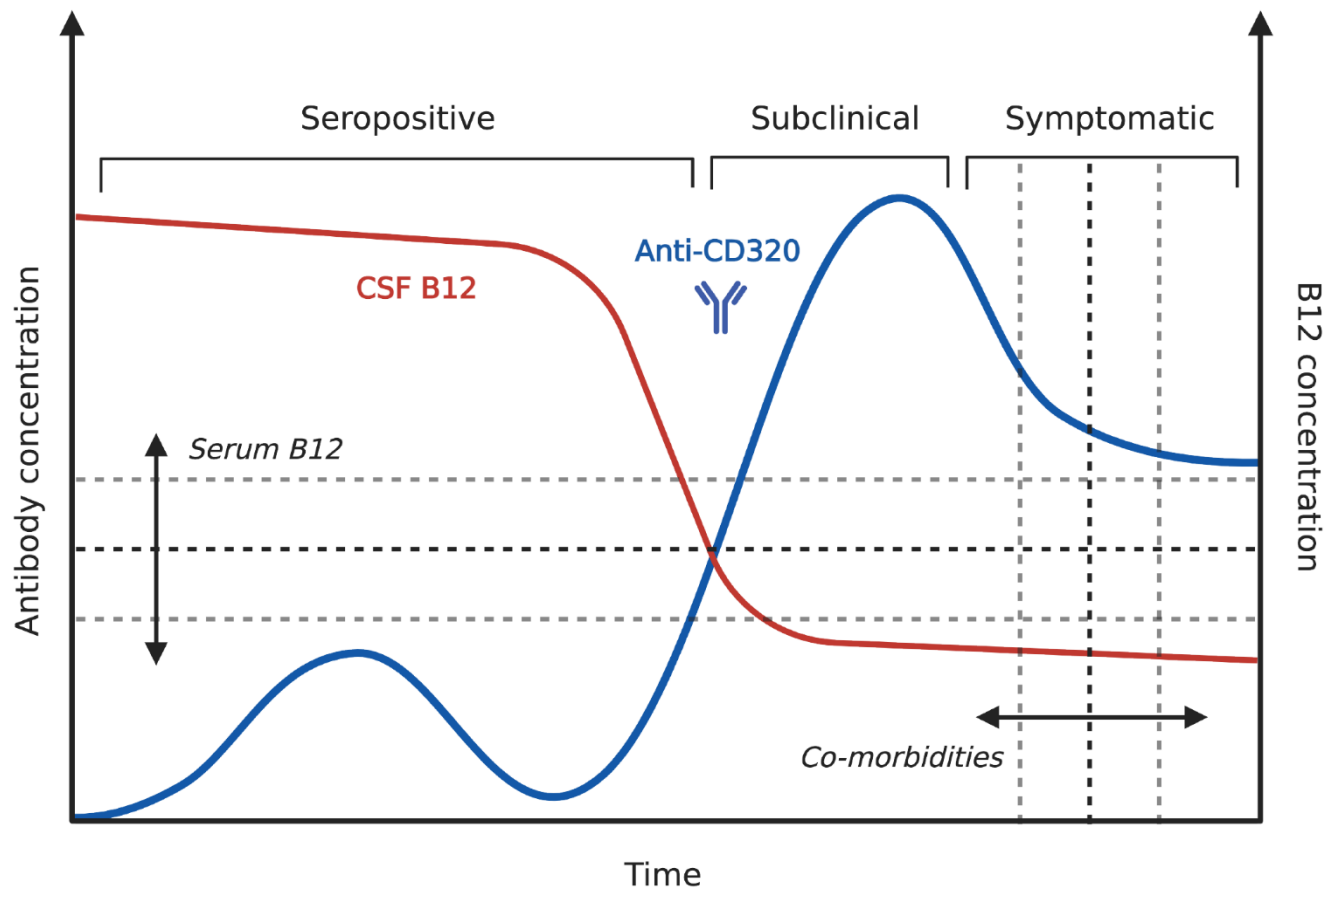

**Fig. S8. Proposed model of anti-CD320 mechanism and natural history of disease.**

(A) Proposed model of anti-CD320 mediated impairment of vitamin B12 transport across the blood-brain barrier. Autoantibodies in the blood impair the uptake function of CD320 on endothelial cells, possibly via internalization and depletion from the luminal cell surface. Holotranscobalamin (holoTC) must cross multiple cellular membranes on its journey to the CSF, including those of endothelial cell (red), pericyte (orange), and astrocyte (purple). Anti-CD320 in the CNS may interfere with uptake of holotranscobalamin by metabolically demanding cell types (neurons, oligodendrocytes), causing neurologic sequelae. These effects may depend on antibody titer, the duration of antibody seropositivity, and host vulnerability. (B) Proposed natural history of central vitamin B12 deficiency, divided into three stages of disease (seropositive without clinical symptoms or metabolic signs, subclinical without clinical symptoms but with metabolic signs, and symptomatic with clinical symptoms and metabolic signs). The transition from seropositive to subclinical central B12 deficiency may depend on serum B12 concentration and antibody titer. The transition from subclinical to symptomatic may depend on the degree and duration of seropositivity (area under the curve) and underlying comorbidities predisposing to neurologic frailty. Figure created with BioRender.com.



**Table S1. Laboratory test results for Case 1.**

| <b>Test</b>                                          | <b>2014</b>    | <b>2018</b> | <b>Reference</b> |
|------------------------------------------------------|----------------|-------------|------------------|
| Vitamin D                                            | 31.4           |             | 10-75 pg/mL      |
| Vitamin E                                            | 13.1           |             | 4.6-17.8 mg/L    |
| Ferritin                                             | 328            |             | 11-307 ng/mL     |
| Vitamin B12                                          | 614            |             | 180-914 pg/mL    |
| MMA (methylmalonic acid)                             | 233            |             | 0-378 nmol/L     |
| Hemoglobin                                           | 11.8           |             | 12-15 g/dL       |
| MCV (mean corpuscular volume)                        | 85.5           |             | 78-100 fL        |
| Platelets                                            | 96             |             | 150-400 k/uL     |
| TSH (thyroid stimulating hormone)                    | 0.75           |             | 0.34-3.5 uIU/mL  |
| ANA (anti-nuclear antibody)                          | 1:1280 (mixed) |             | <1:80            |
| RPR (rapid plasma regain)                            | Non-reactive   |             |                  |
| Copper                                               | 95             |             | 72-166 ug/dL     |
| CSF glucose                                          | 134            |             | 40-70 mg/dL      |
| IgG index                                            | 0.6            |             | 0-0.7            |
| OCBs (oligoclonal bands)                             | 0              |             | 0-1              |
| CSF protein                                          | 54             |             | 15-45 mg/dL      |
| CSF red blood cells                                  | 2              |             | 0                |
| CSF white blood cells                                | 2              |             | 0-5              |
| CSF VDRL (venereal disease research laboratory test) | Non-reactive   |             |                  |
| Lyme IgG                                             | negative       |             |                  |
| Lyme IgM                                             | negative       |             |                  |
| HIV 1/2 Ab                                           | negative       |             |                  |
| HCV Ab                                               | negative       |             |                  |
| HBV Ag                                               | negative       |             |                  |
| HBV surface Ab                                       | positive       |             |                  |
| Quantiferon gold                                     | negative       |             |                  |
| dsDNA antibody                                       | 129            |             | <30 IU/mL        |
| C3                                                   | 96             |             | 71-159 mg/dL     |
| C4                                                   | 12             |             | 13-30 mg/dL      |
| GAD-65 Ab                                            | negative       |             |                  |
| MOG IgG                                              |                | negative    |                  |
| SSA/SSB                                              | negative       |             |                  |
| SM antibody                                          | negative       |             |                  |
| RNP antibody                                         | negative       |             |                  |

|                                                               |          |  |             |
|---------------------------------------------------------------|----------|--|-------------|
| ANCA                                                          | negative |  |             |
| Paraneoplastic Panel                                          |          |  |             |
| ANNA-1                                                        | negative |  |             |
| ANNA-2                                                        | negative |  |             |
| ANNA-3                                                        | negative |  |             |
| AGNA-1                                                        | negative |  |             |
| PCA-1                                                         | negative |  |             |
| PCA-2                                                         | negative |  |             |
| PCA-Tr                                                        | negative |  |             |
| CRMP-5                                                        | negative |  |             |
| Striated muscle                                               | negative |  |             |
| P/Q-type Ca channel                                           | negative |  |             |
| N-type Ca channel                                             | negative |  |             |
| AChR                                                          | negative |  |             |
| VGK channel                                                   | negative |  |             |
| NMO/AQP4                                                      | negative |  |             |
| IgG4                                                          | 29       |  | 1-123 mg/dL |
| TPO ab                                                        | negative |  |             |
| TG ab                                                         | negative |  |             |
| Anti-Cardiolipin IgG                                          | 81       |  | 0-14 U/mL   |
| Anti-Cardiolipin IgM                                          | 80       |  | 0-12 U/mL   |
| B2-glycoprotein IgG                                           | 36       |  | <21         |
| B2-glycoprotein IgM                                           | >130     |  | <21         |
| RVVT (Russel viper venom time)                                | 103      |  | 0-55.1 sec  |
| HIT (heparin-induced thrombocytopenia) antibody               | positive |  |             |
| ESR (erythrocyte sedimentation rate)                          | 66       |  | 0-33mm/hr   |
| CRP (C-reactive protein)                                      | 37.4     |  | <6.3 mg/L   |
| FTA-ABS (fluorescent treponemal antibody antibody-absorption) | negative |  |             |
| Coccidioides Ab                                               | negative |  |             |

**Table S2. Gene and peptide-level counts for phage display.**

| Gene     | Patient 1_REP1 | Patient 1_REP2 | CTRL_REP1 | CTRL_REP2 | CTRL_REP3 | meanFC    | FDR       |
|----------|----------------|----------------|-----------|-----------|-----------|-----------|-----------|
| SUN1     | 6385.65025     | 2802.179481    | 3.1442247 | 1.4985302 | 6.3552737 | 1102.7134 | 0.0010749 |
| CD320    | 623.7213461    | 440.9736431    | 0         | 0         | 1.3175567 | 566.81821 | 0.0011220 |
| ALX4     | 345.0617519    | 293.3509147    | 0.1654855 | 0.0788700 | 1.9375834 | 260.08551 | 0.0014768 |
| PLAGL2   | 204.1543657    | 228.633353     | 0         | 0         | 0         | 432.78771 | 0.0014768 |
| PRRX2    | 102.9018317    | 130.8749754    | 0.0827427 | 0         | 0.3100133 | 185.26698 | 0.0095159 |
| LRRFIP1  | 3653.337712    | 2434.714076    | 15.224667 | 60.020080 | 53.244793 | 70.252403 | 0.0098385 |
| ZBTB21   | 1225.14132     | 171.5697419    | 1.7375979 | 11.830502 | 2.4026034 | 119.91884 | 0.0098385 |
| SMTNL1   | 336.8869722    | 11.06412646    | 0         | 0         | 0         | 347.95109 | 0.0174349 |
| SUGT1    | 47.68621467    | 67.97617424    | 0         | 0         | 0         | 115.66238 | 0.0252697 |
| GRM2     | 644.1582953    | 707.1189318    | 31.773218 | 8.1236113 | 6.0452604 | 42.723999 | 0.0288232 |
| MPZL3    | 25.81509366    | 129.3593416    | 0         | 0.1577400 | 0.7750333 | 95.677489 | 0.0288232 |
| ANKIB1   | 66.90411772    | 35.0869216     | 0         | 0.6309601 | 1.0850467 | 47.570346 | 0.0428992 |
| C12orf45 | 74.07497707    | 26.37202746    | 0         | 0         | 0         | 100.44700 | 0.0428992 |

| Peptide                         | Gene    | Sequence                                            | FC      | FDR     |
|---------------------------------|---------|-----------------------------------------------------|---------|---------|
| gi 195972890 ref NP_001124437.1 | SUN1    | PRMSRRSLRLATTACTLG DGEAVGADSGTSSAVSLKNR AARTTKQRRST | 6530.91 | 0.0022  |
| gi 284925167 ref NP_001165416.1 | SUN1    | SYSSDALDFETEHKLPVFDSPRMSRRSLRLATTACTLG DGEAVGADSG   | 796.08  | 0.0037  |
| gi 767950082 ref XP_011533022.1 | TDRP    | ADPEDTVGGHPSWSGWEDDAKGSTKYTSLASSANSSR WSLRAAGRLSLK  | 1728.48 | 0.0052  |
| gi 55743092 ref NP_068745.2     | ALX4    | RASSDLPSPLEKADSESNKGGKRRNRRTTFTSYQLEELEK VFQKTHYPDV | 632.96  | 0.0063  |
| gi 578805170 ref XP_006712910.1 | LRRFIP1 | HESPSQDISDACEAEATERCEMSEHPSQTVRKALDSNSL ENDDLAPGR   | 4527.18 | 0.0063  |
| gi 740086846 ref NP_001290203.1 | ACLY    | MGAGKSPAGPGQKPDGKLPAAAGVLRILRGSSGLWKK RRARTSAETGRA  | 680.61  | 0.0063  |
| gi 767923065 ref XP_011531938.1 | GRM2    | GCLFAPKLHILFQPQKNVVSHRAPTSRFGSAAARASSSL GQGSQSQFV   | 798.49  | 0.0063  |
| gi 116812638 ref NP_778250.2    | TDRP    | EDDAKGSTKYTSLASSANSSRWSLRAAGRLVSIRRQSK GHLTDSPEEAE  | 3896.72 | 0.01359 |
| gi 118498345 ref NP_008816.3    | ZFH3    | PSPTKPKTKPTWRCEVCDYETNVARNLRIHMTSEKMH NMMLLQQNMTQ   | 370.92  | 0.01438 |
| gi 259906403 ref NP_001159367.1 | CD320   | DELGCGTNEILPEGDATMGPVTVLESVTVSLRNATMGP PVTLESVPSV   | 636.46  | 0.01438 |
| gi 768004140 ref XP_011526619.1 | LPP3    | EGAPRPVAREKTSLSLKRASVDVLLAPRSPMAKENM VTFSHTLPRAS    | 848.05  | 0.01438 |
| gi 768020854 ref XP_011527889.1 | ZBTB21  | SSQSSSVSSDAPGNVLCALSQKSSLKDCSEKTALDDRP QVLQPHRLRS   | 1380.30 | 0.01438 |
| gi 767923088 ref XP_011531949.1 | GRM2    | VSLSGSVVLGCLFAPKLHILFQPQKNVVSHRAPTSRFGS AAARASSSL   | 344.28  | 0.01498 |
| gi 259906403 ref NP_001159367.1 | CD320   | LESVTVSLRNATMGPVTVLESVPSVGNATSSSAGDQSGS PTAYGVIAAA  | 417.04  | 0.02155 |
| gi 530418157 ref XP_005260493.1 | PLAGL2  | FSNGEKLRRPHSLPQPEQRPYSCPQLHCGKAFASKYKLYR HMATHSAQKP | 432.18  | 0.02155 |

**Table S3. Additional clinical information for Cases 1-8.**

|                                     | Case 1                                                                                                                                                                                                                        | Case 2   | Case 3                                                                                                | Case 4 | Case 5                                                                                                                                                                                                                                                                                                                         | Case 6                                      | Case 7 | Case 8                                                        |
|-------------------------------------|-------------------------------------------------------------------------------------------------------------------------------------------------------------------------------------------------------------------------------|----------|-------------------------------------------------------------------------------------------------------|--------|--------------------------------------------------------------------------------------------------------------------------------------------------------------------------------------------------------------------------------------------------------------------------------------------------------------------------------|---------------------------------------------|--------|---------------------------------------------------------------|
| <b>Labs</b>                         |                                                                                                                                                                                                                               |          |                                                                                                       |        |                                                                                                                                                                                                                                                                                                                                |                                             |        |                                                               |
| <i>B12</i>                          | 614                                                                                                                                                                                                                           | 567      |                                                                                                       |        | 803                                                                                                                                                                                                                                                                                                                            | 573                                         |        | 745                                                           |
| <i>MMA</i>                          | .23                                                                                                                                                                                                                           |          |                                                                                                       |        | <b>0.63</b>                                                                                                                                                                                                                                                                                                                    | 0.1                                         |        | 0.18                                                          |
| <i>Homocysteine</i>                 |                                                                                                                                                                                                                               | 6.5      |                                                                                                       |        |                                                                                                                                                                                                                                                                                                                                | 10                                          |        |                                                               |
| <i>ANA</i>                          |                                                                                                                                                                                                                               |          | <1:80                                                                                                 |        | 1:40 (speckled)                                                                                                                                                                                                                                                                                                                |                                             |        | <1:80                                                         |
| <i>dsDNA</i>                        | positive                                                                                                                                                                                                                      |          |                                                                                                       |        | negative                                                                                                                                                                                                                                                                                                                       |                                             |        |                                                               |
| <i>SSA/SSB</i>                      | negative                                                                                                                                                                                                                      |          | <0.2 U                                                                                                |        | negative                                                                                                                                                                                                                                                                                                                       |                                             |        | negative                                                      |
| <i>Rheumatoid Factor</i>            |                                                                                                                                                                                                                               |          | <0.2 U                                                                                                |        | negative                                                                                                                                                                                                                                                                                                                       |                                             |        |                                                               |
| <i>Anti-phospholipid antibodies</i> | positive                                                                                                                                                                                                                      | negative |                                                                                                       |        |                                                                                                                                                                                                                                                                                                                                |                                             |        |                                                               |
| <i>Serum IgG (mg/dL)</i>            | 2210                                                                                                                                                                                                                          |          |                                                                                                       |        | 1470                                                                                                                                                                                                                                                                                                                           |                                             |        | 639                                                           |
| <i>CSF IgG (mg/dL)</i>              | 9.1 (pre-treatment);<br>9.2 (post-treatment)                                                                                                                                                                                  | 6.1      | 6.8                                                                                                   | 6.3    | 5.8                                                                                                                                                                                                                                                                                                                            | 10.2                                        | 6.3    | 2.2                                                           |
| <i>IgG index</i>                    | 0.6                                                                                                                                                                                                                           |          |                                                                                                       |        | 0.8                                                                                                                                                                                                                                                                                                                            |                                             |        | 0.6                                                           |
| <b>Imaging</b>                      |                                                                                                                                                                                                                               |          |                                                                                                       |        |                                                                                                                                                                                                                                                                                                                                |                                             |        |                                                               |
| <i>MRI brain</i>                    | bilateral symmetric T2-weighted hyperintensities in the superior cerebellar peduncles, midbrain tegmentum, dentate nuclei, chief sensory nuclei of cranial nerve V, and rubrospinal tracts persist, with contrast enhancement |          | bilateral superior cerebellar peduncle T2-hyperintensity without enhancement; resolved after steroids |        | scattered foci of bilateral, right greater than left, T2/FLAIR hyperintensities insula, subinsular white matter, and hippocampi with two small foci of enhancement, nonspecific, but consistent with sequela of meningoencephalitis given the history, which may be inflammatory or infectious. No areas of reduced diffusion. | multifocal white matter T2 hyperintensities |        | no intracranial abnormality to explain the patient's weakness |

|                                |                                         |        |                                       |  |                                                                              |                                                   |  |                                                                                                                                                                                                                                                                                                                                                              |
|--------------------------------|-----------------------------------------|--------|---------------------------------------|--|------------------------------------------------------------------------------|---------------------------------------------------|--|--------------------------------------------------------------------------------------------------------------------------------------------------------------------------------------------------------------------------------------------------------------------------------------------------------------------------------------------------------------|
| <i>MRI C/Tspine</i>            | normal                                  | normal | normal                                |  | Multilevel degenerative changes of the spine without severe canal narrowing. | normal                                            |  | Abnormal cord signal within the dorsal and lateral columns of the cervical cord, and likely within the conus medullaris. The thoracic cord was not well evaluated. Findings are compatible with subacute combined degeneration and can be seen in the context of vitamin B12 or copper deficiency as well as due to inflammatory/post-infectious etiologies. |
| <i>MRI L-spine</i>             |                                         |        |                                       |  |                                                                              |                                                   |  |                                                                                                                                                                                                                                                                                                                                                              |
| <b>Medications</b>             |                                         |        |                                       |  |                                                                              |                                                   |  |                                                                                                                                                                                                                                                                                                                                                              |
| <i>Steroids</i>                | IVSM                                    | IVSM   | prednisone                            |  | prednisone                                                                   | none                                              |  | IVSM                                                                                                                                                                                                                                                                                                                                                         |
| <i>B12 supplement</i>          | 1000mcg IM weekly then 2000mcg PO daily | none   | none                                  |  | none                                                                         | none                                              |  | 2000mcg PO daily                                                                                                                                                                                                                                                                                                                                             |
| <i>Other immunosuppression</i> | HCQ                                     | IVIG   | Adalimumab/certolizumab for arthritis |  | Anakinra                                                                     | prior rituximab for MALToma; prior R-CHOP for NHL |  | IVIG/PLEX/rituximab                                                                                                                                                                                                                                                                                                                                          |

Table S4. Case vignettes.

|                                                                                                                                                                                                                                                                                                                                                                                                                                                                                                                                                                                                                                                                                                                                                                                                                                                                                                                                                                                                                                                                                                                                                                                                                                                                                                                                                                                                                                                                                                                                                                                                                                                                                                                                                                                                                                                                                                                                                                                                                                                                                                                                                                                                                                                                                                                                                                                                                                                                                                                                                                                                                                                                                                                                            |
|--------------------------------------------------------------------------------------------------------------------------------------------------------------------------------------------------------------------------------------------------------------------------------------------------------------------------------------------------------------------------------------------------------------------------------------------------------------------------------------------------------------------------------------------------------------------------------------------------------------------------------------------------------------------------------------------------------------------------------------------------------------------------------------------------------------------------------------------------------------------------------------------------------------------------------------------------------------------------------------------------------------------------------------------------------------------------------------------------------------------------------------------------------------------------------------------------------------------------------------------------------------------------------------------------------------------------------------------------------------------------------------------------------------------------------------------------------------------------------------------------------------------------------------------------------------------------------------------------------------------------------------------------------------------------------------------------------------------------------------------------------------------------------------------------------------------------------------------------------------------------------------------------------------------------------------------------------------------------------------------------------------------------------------------------------------------------------------------------------------------------------------------------------------------------------------------------------------------------------------------------------------------------------------------------------------------------------------------------------------------------------------------------------------------------------------------------------------------------------------------------------------------------------------------------------------------------------------------------------------------------------------------------------------------------------------------------------------------------------------------|
| <p><b>Case 2: 51-year-old male with cognitive decline, ataxia, and psychosis</b></p> <p>A previously healthy 51-year-old male presented with 4 weeks of increasing confusion, weakness, gait disorder, and hallucinations. He had recently been traveling internationally and had experienced flu-like symptoms which were resolved at time of admission. A generalized seizure occurred several days into the hospitalization followed by a complicated intensive care unit stay with aspiration pneumonia, pulmonary emboli, and respiratory failure. His brain MRI was unremarkable and CSF showed mild elevation of protein but no pleocytosis. A paraneoplastic antibody panel was negative. Cognitive symptoms and balance returned to near baseline prior to discharge. He returned to work for several weeks, but cognitive and motor symptoms recurred, including multiple falls due to challenges with balance and weakness.</p> <p>He was readmitted to the hospital, again with unremarkable MRI brain, CSF with elevated protein but otherwise normal, negative CSF paraneoplastic and autoimmune encephalopathy panel, negative oligoclonal bands, negative whole body PET scan for malignancy, and negative scrotal ultrasound. EEG showed a single left anterior temporal sharp and slow wave discharge superimposed on a normal posterior dominant rhythm. Neuropsychological testing showed impairments in attention (Trails A: 50 sec.), memory (2/10 on wordlist delayed recall), executive function (could not complete Trails B), language (category fluency: 13 animals in 60 sec.), and MOCA (18/30). Neurological exam was notable for a fine high amplitude action tremor, wide-based gait, startle myoclonus, and frontal release signs including glabellar tap and palmomental reflex. He eventually received 5 days of IV solumedrol and demonstrated remarkable improvement in symptoms.</p> <p>Over the course of the next several months, he was readmitted multiple times for pulse steroids and ultimately started on IVIG every 3 weeks with complete resolution of motor and cognitive symptoms. Repeat MRI brain scans never showed any abnormal signal or enhancement, nor was there any evidence of progressive atrophy when comparing scans. Repeat neuropsychological testing (7 months after the testing above) demonstrated normal cognition (attention: Trails A-20 sec.; memory: 9/10 on wordlist delayed recall; executive function: Trails B-65 sec.; language: category fluency-26 animals in 60 sec.; MOCA-27/30). Tremulousness and gait disorder had also resolved. He remained on IVIG for 3 years and was slowly tapered off with full return to work without cognitive sequelae.</p> |
| <p><b>Case 3: 44 year-old male with joint pain, gait impairment, and imbalance</b></p> <p>A previously healthy 44-year-old male presented with acute on chronic diffuse musculoskeletal pain and weakness. He reported that symptoms had started about a year prior to presentation, starting subtly and worsening acutely 4 months prior to presentation after 1 week of nasal congestion and diarrhea. Shortly after, he developed migratory joint pain starting in the left hip, then right hip, then right shoulder. Ultimately, the pain involved the large joints, chest, neck and back. He had substantial difficulty rising from a chair and walking short distances in part due to balance issues. He lost weight from baseline weight of 190 to 177 lbs. Initial lumbar puncture showed 69 white blood cells, 9 red blood cells, total protein of 64 mg/dL, normal glucose, and zero oligoclonal bands. Two months after presentation, a brain MRI revealed T2-hyperintensity in the cerebellar peduncles and dorsal brainstem without enhancement. C- and T-spine MRI showed equivocal anterior spinal cord T2-hyperintensity without enhancement. Initial management included prednisone taper with improvement after first dose, then plateauing of improvement. Repeat lumbar puncture showed resolution a WBC &lt;1/μL and protein of 98 mg/dL. Infectious workup was negative except for CSF meta-next generation sequencing positive for <i>Bacillus infantis</i> which was felt to be a contaminant. Rheumatology evaluation suggested axial inflammatory arthritis and spondyloarthritis and the patient started treatment with adalimumab, initially with a good response but developed autoantibodies. He then switched to certolizumab with partial response.</p>                                                                                                                                                                                                                                                                                                                                                                                                                                                                                                                                                                                                                                                                                                                                                                                                                                                                                                                                                    |
| <p><b>Case 5: 60 year-old male with cognitive decline, bilateral scleral injection, and hearing loss</b></p> <p>A previously healthy 60 year-old male presented with subacute progressive cognitive decline, bilateral scleral injection, and hearing loss. One month prior to presentation, he developed leg pain requiring a crutch to walk. A few weeks later, he started displaying odd behaviors including driving the wrong direction in a car, laughing inappropriately, and occasionally speaking unintelligibly. Over the next few weeks, he began to develop headaches. These were intermittent and without meningism. He started to become confused at work and was unable to complete simple tasks. In addition, he developed hearing loss. This prompted presentation to a hospital, where lumbar puncture yielded CSF with a lymphocytic pleocytosis but with a significant percentage of polymorphonuclear cells (WBC 39, Lymph 73%, PMN 26%), elevated protein (80), and a normal glucose (53). His brain MRI demonstrated subtle leptomeningeal enhancement and parenchymal changes in the lentiform nucleus. He was briefly treated with antimicrobials, but these were stopped after two days as it was felt he did not have features consistent with a bacterial meningitis. During his hospital admission, he developed bilateral scleral injection. There was no discharge or gritty sensation of the eyes. He also developed profound hearing loss at this stage and required a whiteboard to communicate. A repeat LP demonstrated a worsening pleocytosis (WBC 120, Lymph 73%, PMN 11%). A broad infectious workup and cytology were negative. He was discharged from the hospital with a walker due ongoing pain and soreness in his lower limbs, and had developed a new bilateral upper extremity action tremor.</p> <p>He was referred to a neuroimmunology specialty clinic where atypical infectious (TB, fungal, VZV), autoimmune (autoimmune encephalitis, sarcoidosis, Vogt-Koyanagi-Harada, Susac's and Cogan's syndrome, systemic vasculitis), and neoplastic</p>                                                                                                                                                                                                                                                                                                                                                                                                                                                                                                                                                                                                                                      |

etiologies were considered (lymphoma). Repeat LP demonstrated persistent pleocytosis with an elevated OCB and IgG index. Next generation metagenomic sequencing did not demonstrate an infective cause. CT chest/abdomen/pelvis, testicular ultrasound, and a PET scan did not demonstrate evidence of a malignancy. An encephalopathy panel was also negative for paraneoplastic or autoimmune causes. Ophthalmological review did not demonstrate any evidence of ongoing uveitis. ESR and CRP were elevated.

He was empirically treated with prednisone for presumed autoimmune meningoencephalitis and experienced significant improvement in his mood and mobility. Upon tapering the steroids, he experienced worsening behavioral changes characterized by automatisms of rearranging bathroom items and speaking incoherently. He had a generalized tonic-clonic seizure and re-presented to the hospital. Repeat brain MRI demonstrated interval progression FLAIR hyperintensities and leptomeningeal enhancement. He underwent a brain biopsy that was non-diagnostic and received high dose steroids, rituximab, and IVIG. This suspected relapse of autoimmune meningoencephalitis left him bedbound and non-verbal. A repeat lumbar puncture after discharge demonstrated recurrent pleocytosis, and he was empirically treated with Anakinra given prior failure of steroids and rituximab. Genetic testing revealed a heterozygous mutation in the C5 gene of uncertain significance. He contracted a severe COVID-19 infection and died without a clear diagnosis.

#### **Case 6: 52 year-old male with HIV, cognitive decline, and progressive white matter disease**

A 52-year-old male with a history of gastric marginal zone lymphoma, non-Hodgkin's lymphoma, toxoplasma encephalitis, and HIV infection presented with gradual cognitive decline and progressive subcortical white matter lesions. He was diagnosed with gastric marginal zone lymphoma 9 years prior to presentation and treated with a course of rituximab. Four years later, he was diagnosed with non-Hodgkin's lymphoma and treated with cyclophosphamide, doxorubicin, vincristine, prednisone, and rituximab (R-CHOP) and radiation. One year later, he was found to be HIV-positive in the context of biopsy confirmed toxoplasma encephalitis that was successfully treated with pyrimethamine, sulfadiazine, leucovorin, and antiretroviral therapy (ART). Despite ART with suppression of plasma HIV below the limit of detection and a rise in his CD4 T-cell count to >200 cells/ $\mu$ L, he continued to develop new subcortical white matter lesions though there was no mass effect and no enhancement suggesting a process separate from the treated toxoplasma encephalitis.

He continued to exhibit a gradual decline in cognitive function over several years with impairments in memory, executive function, and psychomotor speed predominantly. Serial lumbar punctures were unrevealing for opportunistic infections or evidence of detectable HIV in CSF. A brain biopsy of one of the white matter lesions that developed after toxoplasma encephalitis treatment showed mild astrogliosis and no other inflammatory or infectious features. Despite escalations of ART and continued maintenance toxoplasma encephalitis treatments, he continued to have progressive cognitive decline and worsened global cerebral atrophy with some suggestion of increasing size of existing white matter lesions. Serum vitamin B12, methylmalonic acid, and homocysteine levels consistently remained within normal limits without supplementation.

#### **Case 8: 80 year-old male with progressive numbness and weakness**

An 80 year-old male with a history of hypertension and hyperlipidemia contracted COVID-19 and recovered over the course of 2 weeks. One month later, he developed bilateral toe numbness followed by bilateral leg weakness. These symptoms progressed until he developed new bowel and bladder incontinence, prompting urgent imaging which revealed lumbar stenosis for which a laminoforaminotomy was performed. His post-op course was complicated by a pulmonary embolism. On post-op day three, his leg weakness worsened. Total spine imaging revealed dorsal column and lateral corticospinal white matter tract T2 hyperintensity throughout the cervical and thoracic cord. Serum vitamin B12, MMA, and copper were normal. Lumbar puncture yielded CSF with 3 WBCs, 14 RBCs, protein of 41, glucose of 65, normal IgG index, and zero oligoclonal bands. A paraneoplastic antibody panel, AQP4 antibody, and MOG antibody were negative. He was empirically treated with high-dose steroids followed by plasmapheresis due to lack of response for a presumed post-COVID myelitis. He was then treated with rituximab and empiric high dose oral vitamin B12 supplementation despite normal serum levels. Lower extremity motor function and sensory deficits partially recovered.

**Table S5. Clinical phenotypes of anti-CD320 positive NPSLE cases.**

| ID      | Clinical history                                   | SLE diagnosis | Aseptic meningitis | Cerebrovascular disease (not otherwise explained by APLS) | Demyelinating syndrome | Movement disorder | Myelopathy (not otherwise explained by AQP4) | Seizure disorders | Acute confusional state | Cognitive dysfunction (moderate or severe) | Severe depression (acute onset) | Psychosis |
|---------|----------------------------------------------------|---------------|--------------------|-----------------------------------------------------------|------------------------|-------------------|----------------------------------------------|-------------------|-------------------------|--------------------------------------------|---------------------------------|-----------|
| Case 1  | 63F w/ ataxia, tremor, scanning speech             | x             |                    |                                                           |                        |                   | x                                            |                   |                         | x                                          |                                 |           |
| NPSLE_2 | 46F w/ progressive encephalopathy and psychosis    | x             |                    |                                                           |                        |                   |                                              |                   |                         | x                                          |                                 | x         |
| NPSLE_3 | 53F w/ cognitive decline                           | x             |                    |                                                           |                        |                   |                                              |                   |                         | x                                          |                                 |           |
| NPSLE_4 | 43F w/ progressive myelopathy, seizures, psychosis | x             |                    |                                                           | x                      |                   | x                                            | x                 |                         | x                                          |                                 | x         |
| NPSLE_5 | Child w/ meningitis and myelopathy                 | x             | x                  |                                                           | x                      |                   | x                                            |                   |                         |                                            |                                 |           |
| NPSLE_6 | 35F w/ encephalopathy, psychosis, seizures         | x             |                    |                                                           |                        |                   |                                              | x                 |                         | x                                          |                                 | x         |



**Table S6. CRISPR screen hits.**

| Symbol         | Combo<br>casTLE<br>Effect | Combo<br>casTLE<br>Score | FDR      |
|----------------|---------------------------|--------------------------|----------|
| MYLIP          | 4.8                       | 167                      | 1.00E-05 |
| LDLR           | -3.7                      | 114                      | 1.00E-05 |
| FECH           | 4.6                       | 111                      | 1.00E-05 |
| SLC46A3        | 2.8                       | 102                      | 1.00E-05 |
| VPS4A          | 4.2                       | 90.8                     | 1.00E-05 |
| CD320          | -2.7                      | 72.5                     | 1.00E-05 |
| MEN1           | -3.6                      | 58.1                     | 1.00E-05 |
| CAND1          | 2.4                       | 51.6                     | 1.00E-05 |
| MAP2K3         | -2.9                      | 50.9                     | 1.00E-05 |
| PPOX           | 3.4                       | 44.7                     | 1.00E-05 |
| TSC1           | 2.9                       | 44.1                     | 1.00E-05 |
| RPTOR          | -2.4                      | 42.4                     | 1.00E-05 |
| KLF16          | 2.6                       | 38.6                     | 1.00E-05 |
| ZC3H13         | 3.5                       | 37.5                     | 1.00E-05 |
| GFI1B          | -2.7                      | 37.2                     | 1.00E-05 |
| PPP2R2A        | -2.3                      | 35.4                     | 1.00E-05 |
| MAP3K4         | -3.2                      | 35                       | 1.00E-05 |
| NEDD8-<br>MDP1 | 2.3                       | 32.9                     | 1.00E-05 |
| UROD           | 4.4                       | 32.1                     | 1.00E-05 |
| TMED10         | -3                        | 31.9                     | 1.00E-05 |
| ATP6V1C1       | -2.7                      | 31.5                     | 1.00E-05 |
| SHFM1          | -2.4                      | 31.2                     | 1.00E-05 |
| STAT5A         | 1.6                       | 30.2                     | 1.00E-05 |
| PRPF6          | 2.4                       | 30.2                     | 1.00E-05 |
| ATP6V1G1       | -2                        | 29.9                     | 1.00E-05 |
| HSPA14         | 4.3                       | 29.4                     | 1.00E-05 |
| MARCKSL1       | -2.2                      | 28.8                     | 1.00E-05 |
| SF1            | 1.7                       | 28.7                     | 1.00E-05 |
| AP2B1          | -2.1                      | 28.5                     | 1.00E-05 |
| CCND3          | 3.2                       | 28                       | 1.00E-05 |
| UBA6           | 1.8                       | 28                       | 1.00E-05 |
| EXOC2          | -2.6                      | 27.8                     | 1.00E-05 |
| UBR5           | -2.2                      | 27.7                     | 1.00E-05 |
| SEC31B         | -2.2                      | 27.6                     | 1.00E-05 |
| LAMTOR3        | -1.9                      | 27.4                     | 1.00E-05 |
| TSG101         | 1.9                       | 27.3                     | 1.00E-05 |

|          |      |      |          |
|----------|------|------|----------|
| PPP1R10  | -3.3 | 26.9 | 1.00E-05 |
| EXOC6    | -3.1 | 26.7 | 2.00E-05 |
| CHORDC1  | -2.2 | 26.5 | 3.00E-05 |
| FAM117A  | 2.6  | 26.4 | 3.00E-05 |
| FO XK1   | -2.5 | 26.3 | 3.00E-05 |
| ALDH18A1 | -2   | 25.8 | 3.00E-05 |
| ABCE1    | 2.5  | 25.8 | 3.00E-05 |
| COMMD10  | 2.7  | 25.4 | 4.00E-05 |
| MCM10    | 2.2  | 25   | 4.00E-05 |
| ATP6V1A  | -1.8 | 24.9 | 5.00E-05 |
| RASA3    | 1.6  | 24.8 | 5.00E-05 |
| TMEM261  | -3   | 24.5 | 6.00E-05 |
| NRF1     | -1.5 | 24.3 | 6.00E-05 |
| CNPY1    | 4.4  | 24.3 | 6.00E-05 |
| CDC23    | 2.5  | 24.3 | 6.00E-05 |
| SPINK6   | -1.9 | 24.2 | 6.00E-05 |
| SMARCA5  | 2.4  | 24   | 7.00E-05 |
| FIP1L1   | 2.5  | 24   | 7.00E-05 |
| ZC3H4    | -1.6 | 23.8 | 9.00E-05 |
| TTI2     | -2.9 | 23.5 | 0.00012  |
| CNOT3    | -2.5 | 23.4 | 0.00012  |
| RPL13    | 2.2  | 23.4 | 0.00012  |
| COPZ1    | -2.1 | 22.9 | 0.00014  |
| NEDD8    | 2.3  | 22.9 | 0.00014  |
| HLA-DOA  | -3.4 | 22.8 | 0.00014  |
| SNW1     | 4.7  | 22.8 | 0.00014  |
| NUP43    | -2   | 22.6 | 0.00014  |
| EIF2AK1  | -2.7 | 22.6 | 0.00014  |
| ZBTB7B   | -2.3 | 22.5 | 0.00014  |
| PAXBP1   | 1.7  | 22.4 | 0.00014  |
| WDR91    | 1.7  | 22.3 | 0.00015  |
| GCN1L1   | 2.7  | 21.9 | 0.00019  |

**Data file S1.** Raw data for figures.
